# Supplementary material for: Serum and Fecal Amino Acid Profiles in Cats with Chronic Kidney Disease
Source: MDPI journal article supplement (doi:10.3390/vetsci9020084), 2022-02-17
Supplement: s1 [file s1]

# Serum and Fecal Amino Acid Profiles in Cats with Chronic Kidney Disease

Stacie C. Summers, Jessica Quimby, Amanda Blake, Deborah Keys, Joerg M. Steiner and Jan Suchodolski

**Table S1.** Fecal amino acid concentrations for healthy cats and cats with chronic kidney disease (CKD). Effect size reported as mean difference and standard error of the mean (SEM).

| Amino Acid (µg/g)        | Healthy cats (n=16) | CKD Cats (n=31) | Unadjusted P-value (Welch t-test) | Mean Difference +/- SEM |
|--------------------------|---------------------|-----------------|-----------------------------------|-------------------------|
| Essential Amino Acids    |                     |                 |                                   |                         |
| Isoleucine               | 24.0 +/- 17.0       | 25.8 +/- 16.4   | 0.74                              | 1.7 +/- 5.2             |
| Leucine                  | 38.9 +/- 25.0       | 37.7 +/- 21.9   | 0.87                              | 1.2 +/- 7.4             |
| Lysine                   | 5.9 +/- 6.9         | 8.5 +/- 8.0     | 0.27                              | 2.5 +/- 2.2             |
| Methionine               | 8.3 +/- 5.7         | 9.9 +/- 5.8     | 0.37                              | 1.6 +/- 1.8             |
| Phenylalanine            | 18.3 +/- 11.8       | 17.8 +/- 10.9   | 0.90                              | 0.4 +/- 3.5             |
| Threonine                | 4.2 +/- 3.1         | 5.7 +/- 4.2     | 0.20                              | 1.4 +/- 1.1             |
| Tryptophan               | 5.5 +/- 4.4         | 6.3 +/- 4.3     | 0.57                              | 0.8 +/- 1.3             |
| Valine                   | 25.7 +/- 17.8       | 28.1 +/- 18.2   | 0.66                              | 2.5 +/- 5.5             |
| Nonessential Amino Acids |                     |                 |                                   |                         |
| Alanine                  | 23.6 +/- 16.7       | 27.6 +/- 18.8   | 0.46                              | 4.0 +/- 5.4             |
| Aspartic acid            | 0.28 +/- 0.6        | 0.7 +/- 0.7     | 0.12                              | 0.3 +/- 0.2             |
| Citrulline               | 5.8 +/- 4.6         | 7.9 +/- 6.2     | 0.20                              | 2.1 +/- 1.6             |
| Glutamic acid            | 2.5 +/- 2.4         | 4.1 +/- 4.3     | 0.10                              | 1.6 +/- 1.0             |
| Glycine                  | 1.3 +/- 1.2         | 2.5 +/- 2.7     | 0.03                              | 1.2 +/- 0.6             |
| Hydroxyproline           | 0.70 +/- 0.94       | 0.52 +/- 0.72   | 0.51                              | 0.18 +/- 0.27           |
| Ornithine                | 0.35 +/- 0.46       | 0.54 +/- 0.55   | 0.23                              | 0.19 +/- 0.15           |
| Proline                  | 6.9 +/- 4.5         | 11.6 +/- 9.8    | 0.03                              | 4.7 +/- 2.1             |
| Serine                   | 1.3 +/- 1.3         | 1.6 +/- 1.6     | 0.44                              | 0.33 +/- 0.42           |
| Tyrosine                 | 10.6 +/- 6.6        | 14.7 +/- 9.9    | 0.10                              | 4.1 +/- 2.4             |
